# Supplementary material for: Effect of Yb3+ concentration on the upconversion emission properties of sub 10 nm RbY2F7:Yb, Er nanoparticles
Source: Royal Society of Chemistry journal article supplement (doi:10.1039/d4cp02756f), 2024-01-01
Supplement: d4cp02756f1.pdf [file d4cp02756f1.pdf]

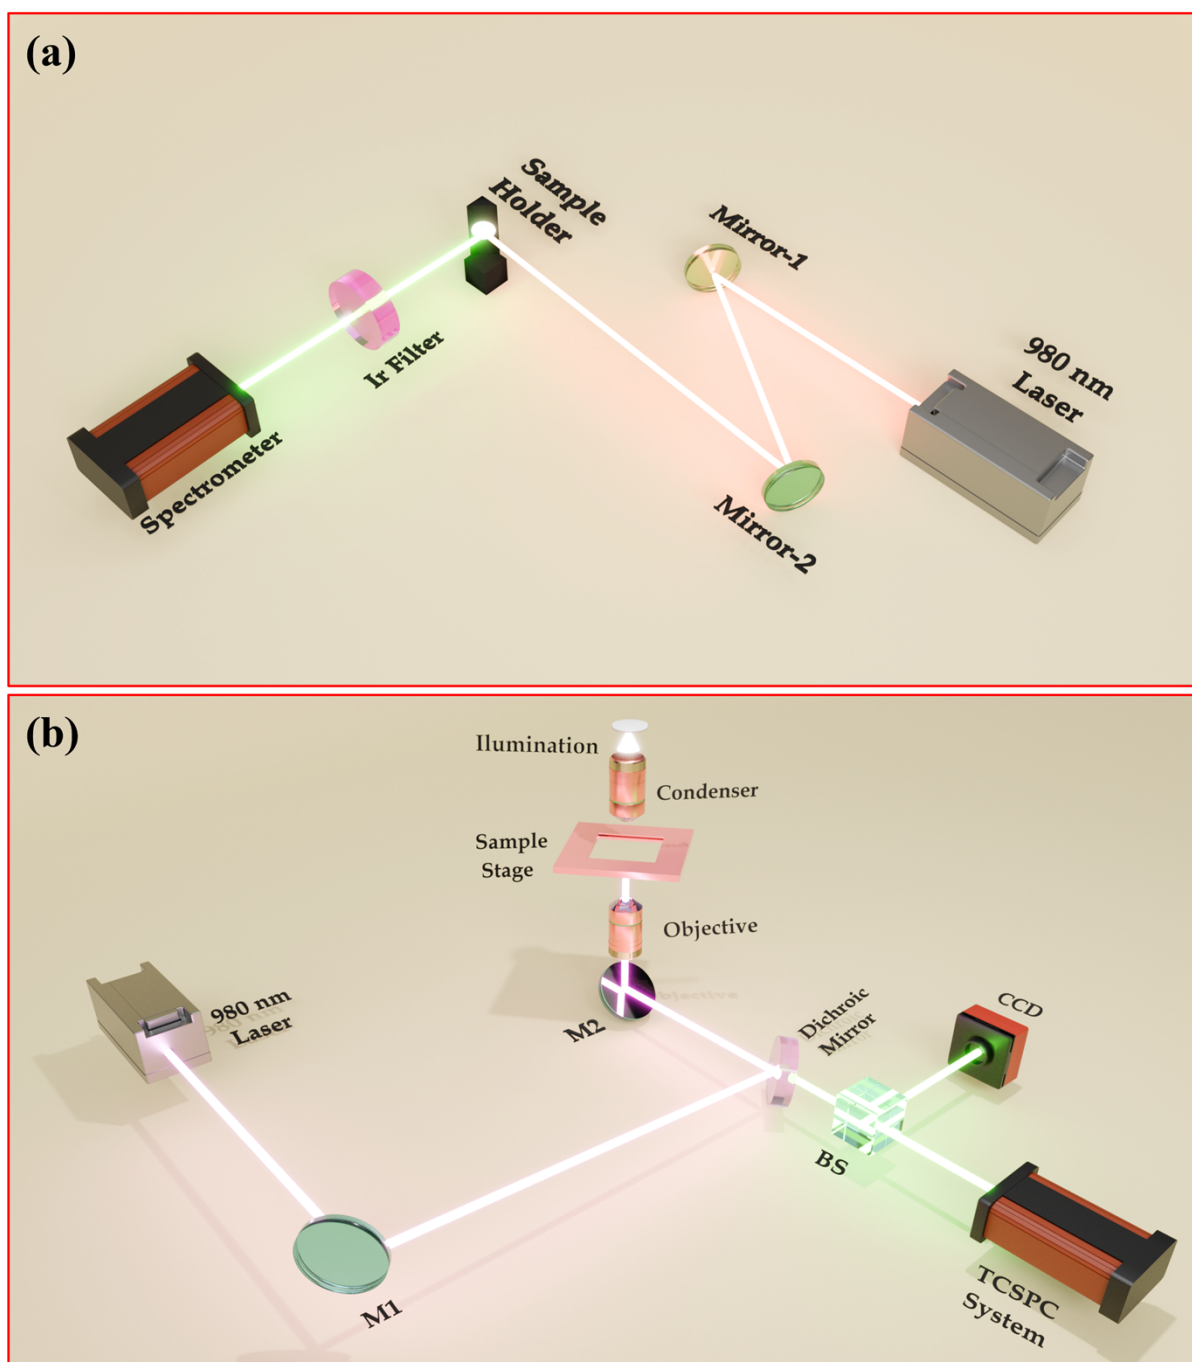

**Fig.S1(a)** Schematic representation of experimental set up used to obtain the upconversion emission spectrum and **(b)** optical tweezers setup used to obtain the decay lifetime data.

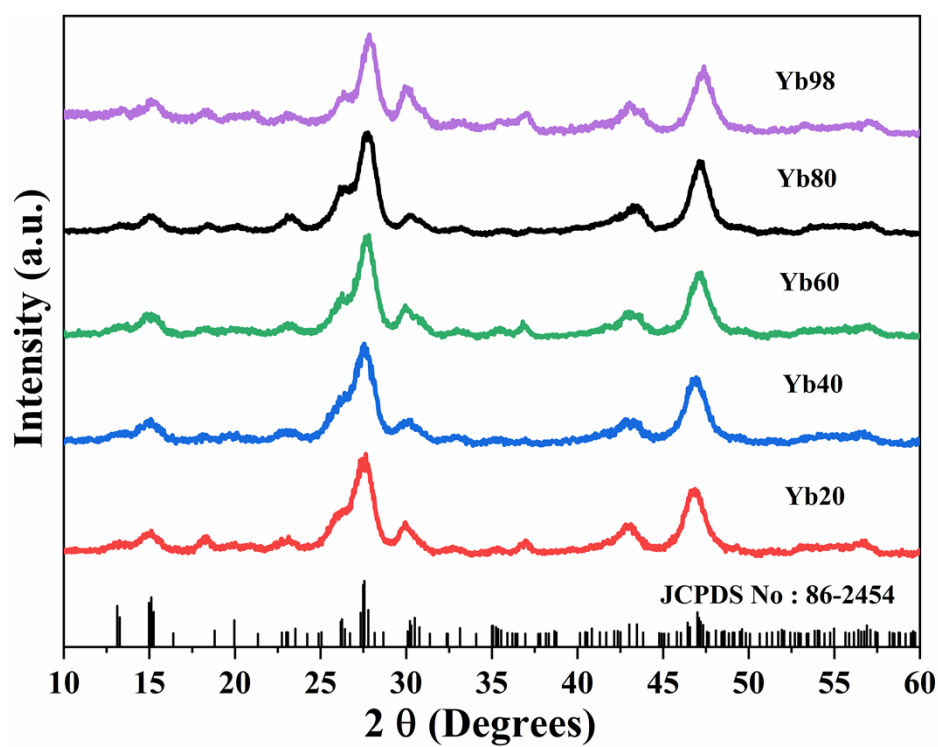

Fig-S2: X-ray diffraction pattern of  $\text{RbY}_2\text{F}_7$  of varying Yb concentration from 20% to 98%

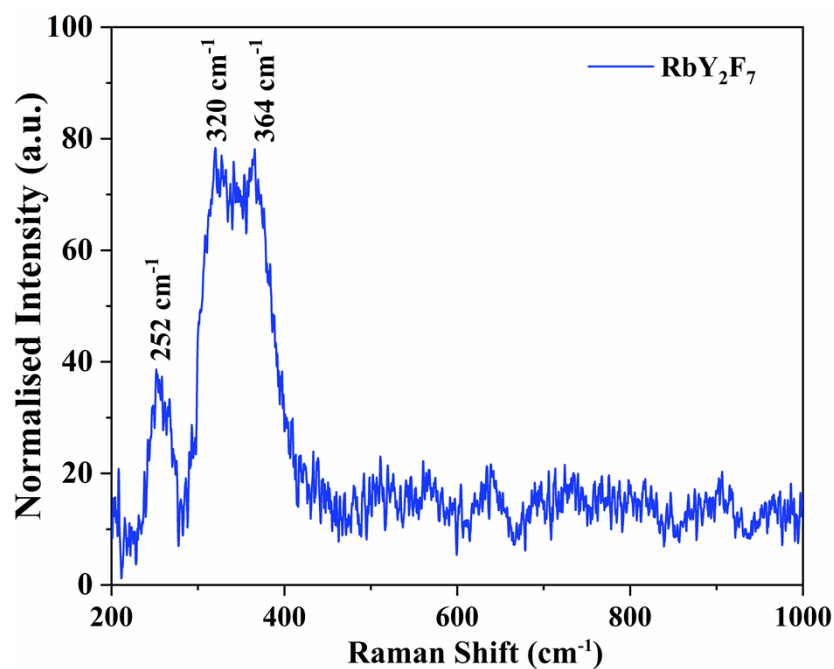

Fig-S3 Raman spectrum of the undoped  $\text{RbY}_2\text{F}_7$  nanoparticles

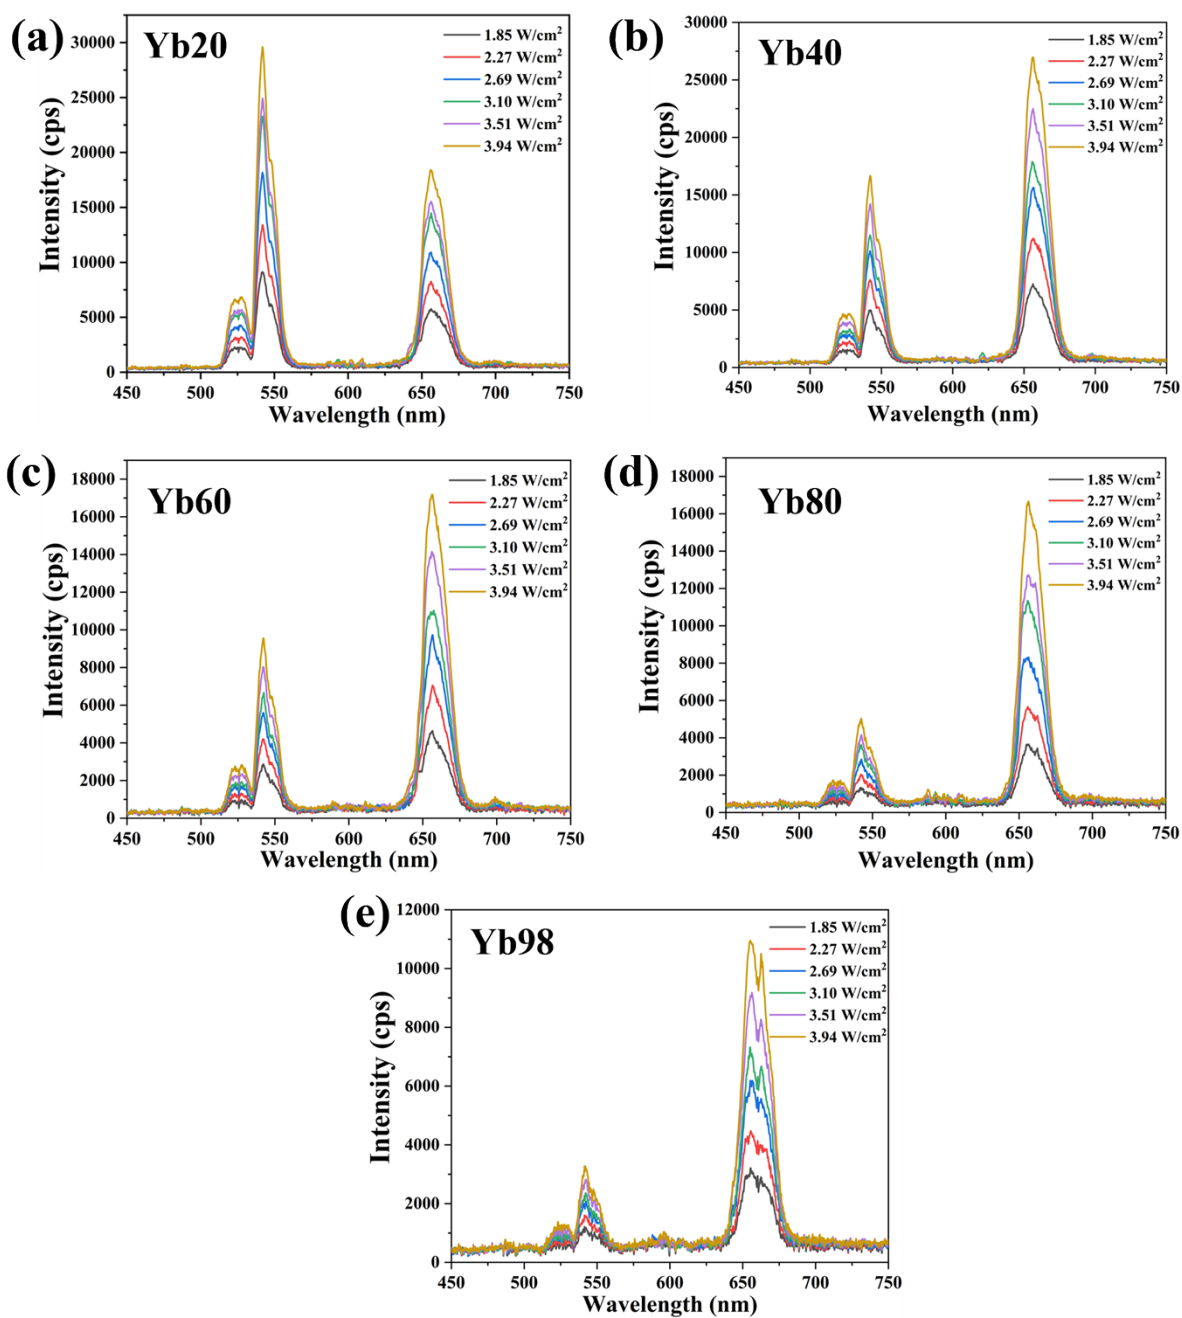

**Fig-S4: Power dependent upconversion emission spectrum of  $\text{RbY}_2\text{F}_7$  of varying Yb concentration from 20% to 98%**
